# Supplementary material for: Identification of Novel QTL for Mercury Accumulation in Maize Using an Enlarged SNP Panel
Source: MDPI journal article supplement (doi:10.3390/genes15020257), 2024-02-19
Supplement: s1 [file s1]

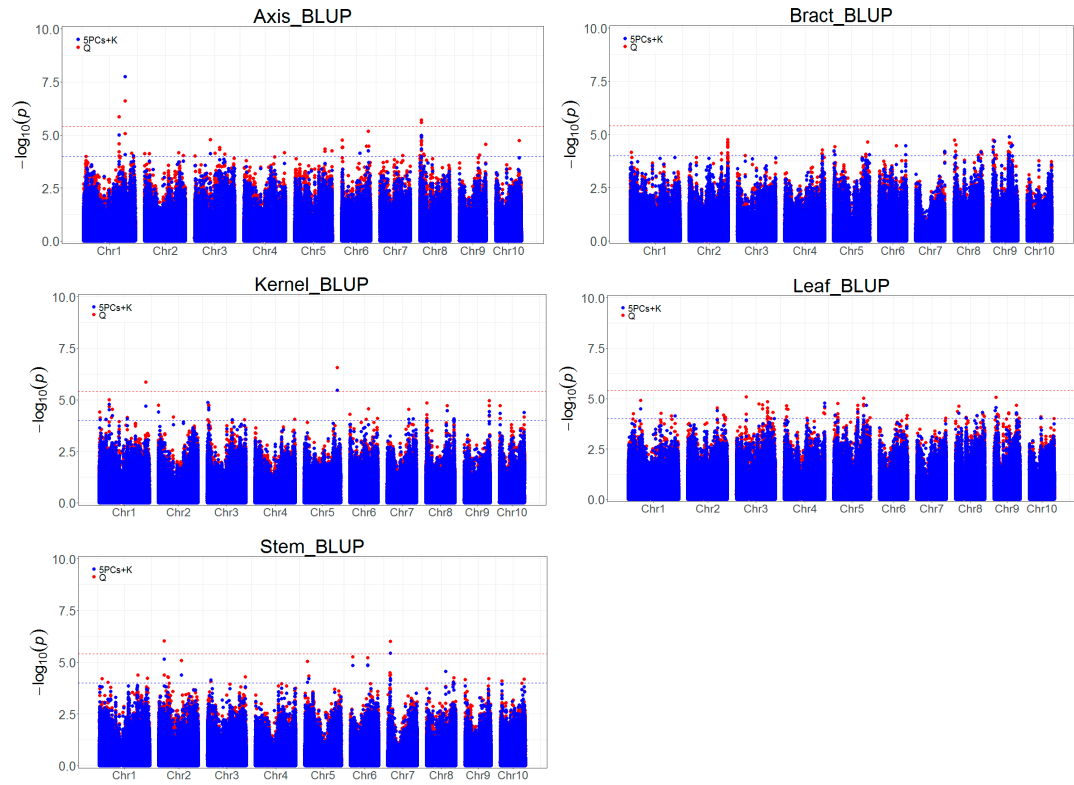

**Figure S1.** Comparison of Manhattan plots resulting from GWAS, based on 0.55 M SNPs, using Q model and 5PCs + K model for mercury content in maize axis, stem, bract, leaf, and kernel at BLUP environments.

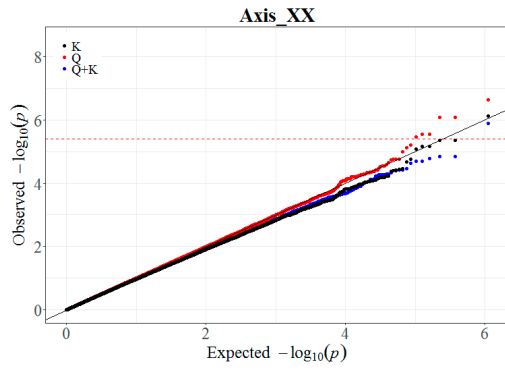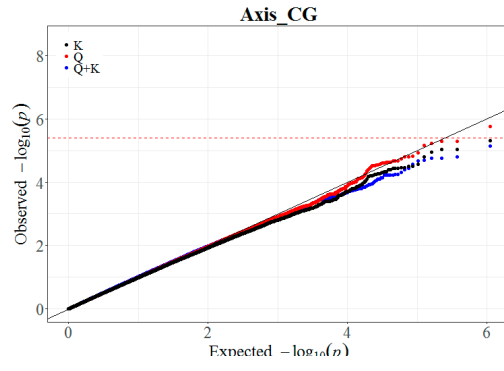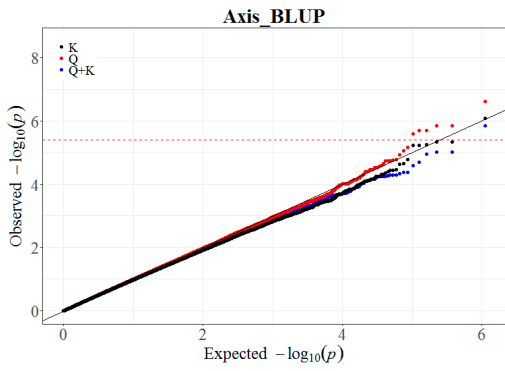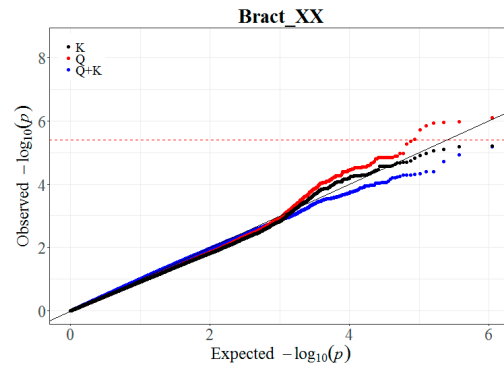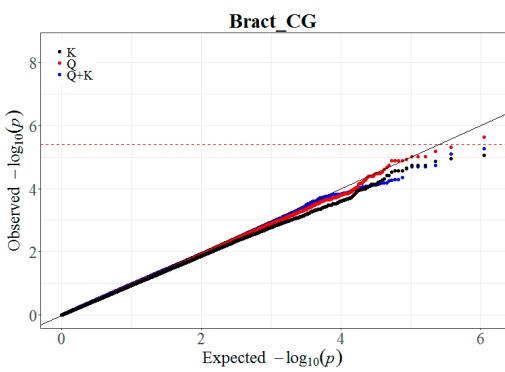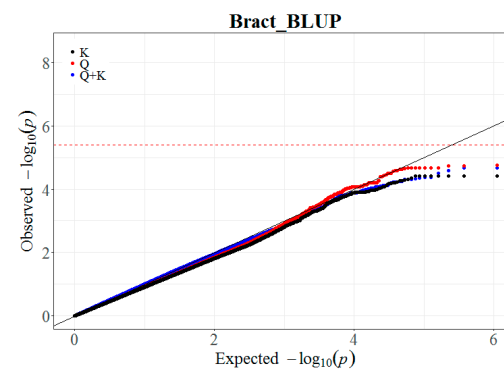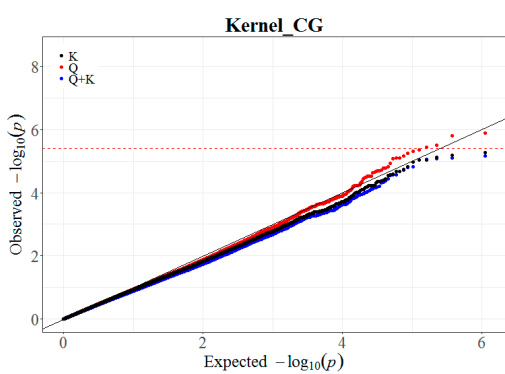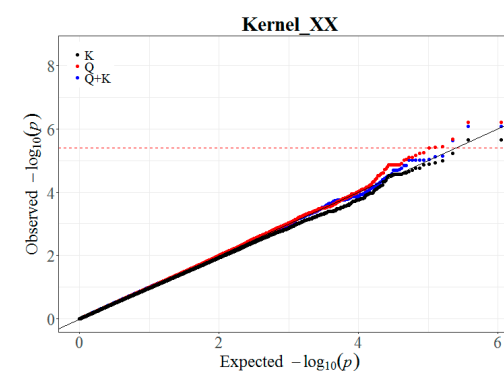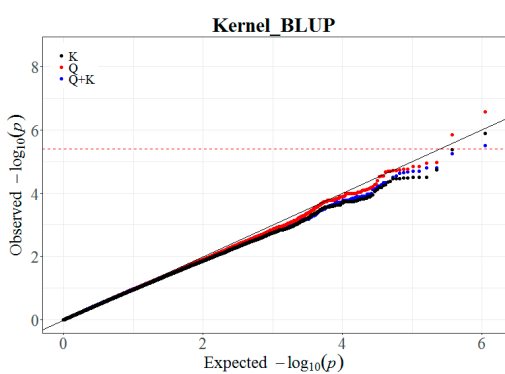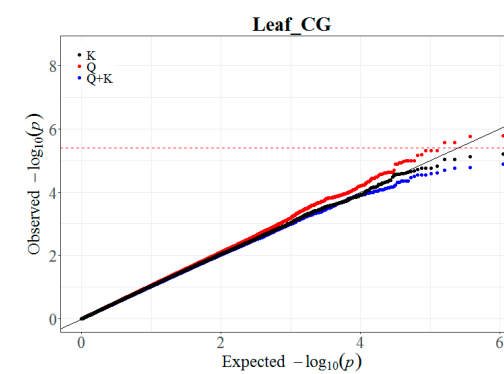

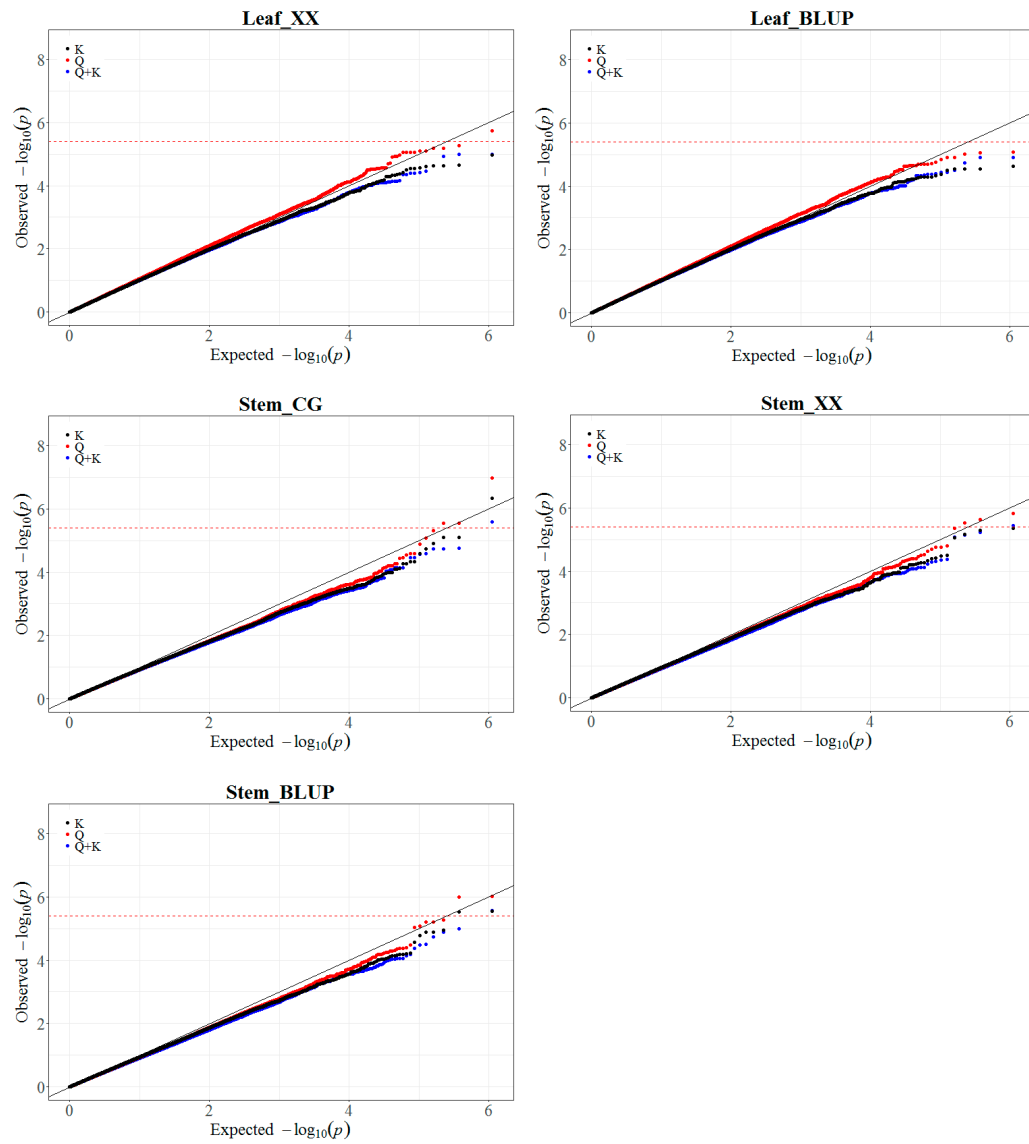

**Figure S2.** Comparison of quantile–quantile (QQ) plots resulting from GWAS, based on 0.55 M SNPs, using three models (Q, K, and Q + K) for mercury content in maize axis, stem, bract, leaf, and kernel in three environments.

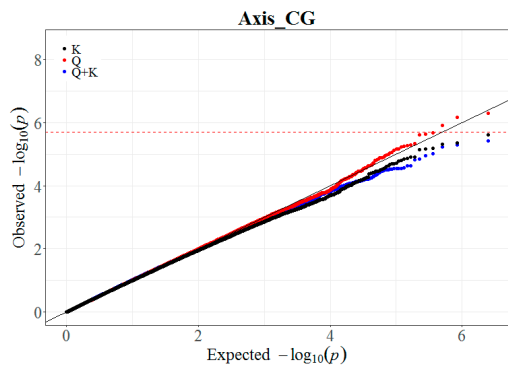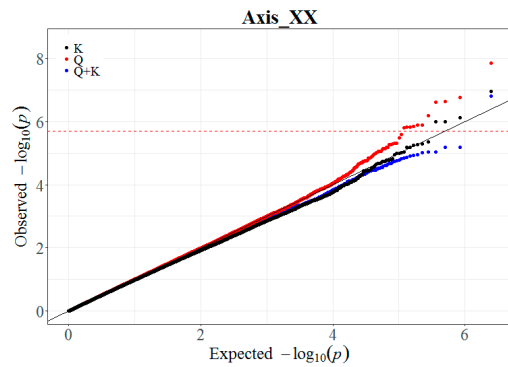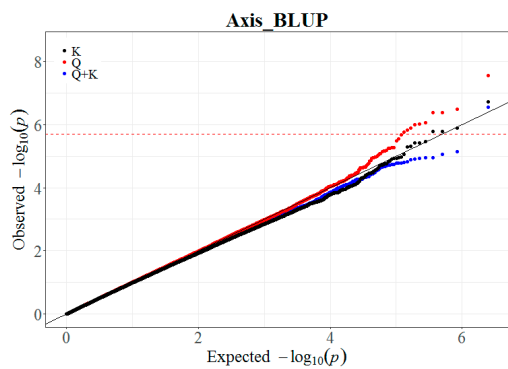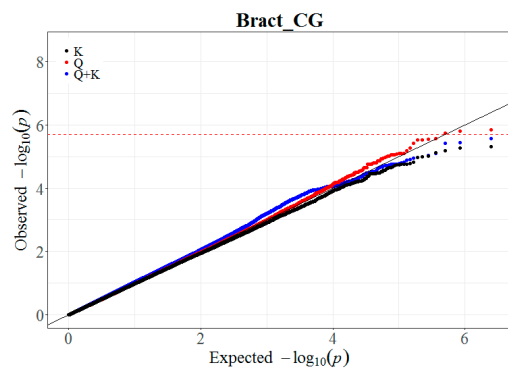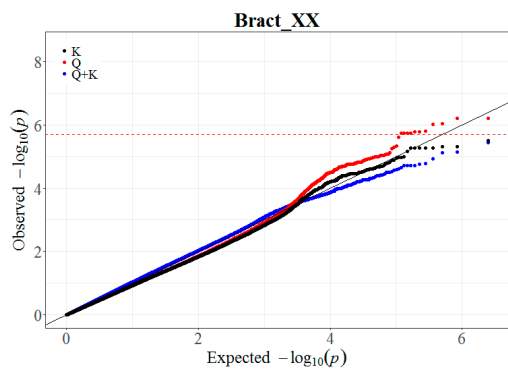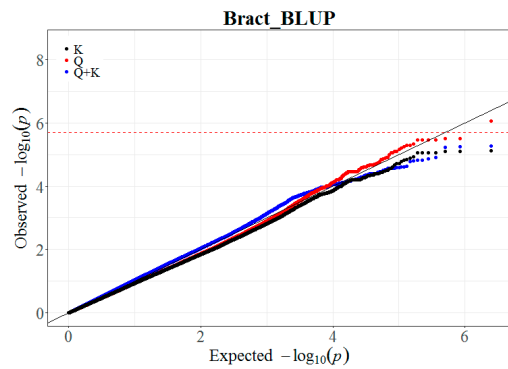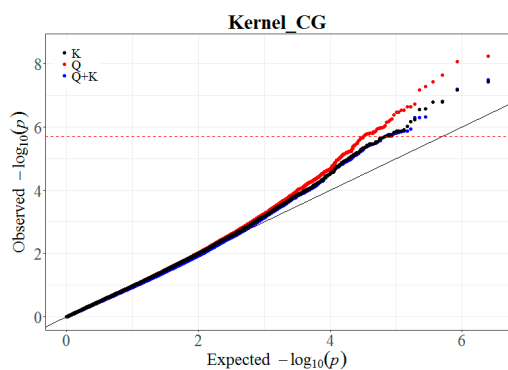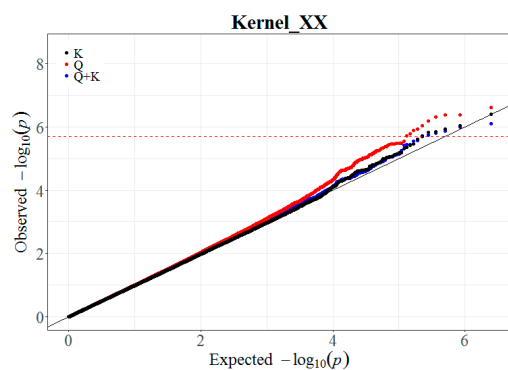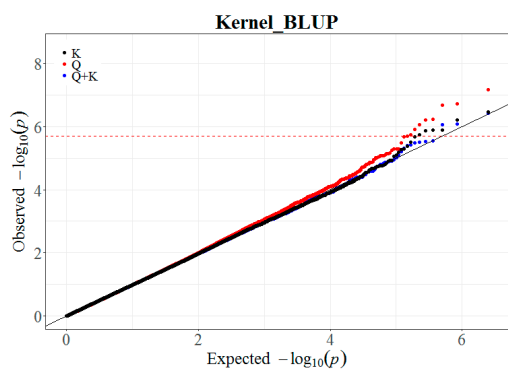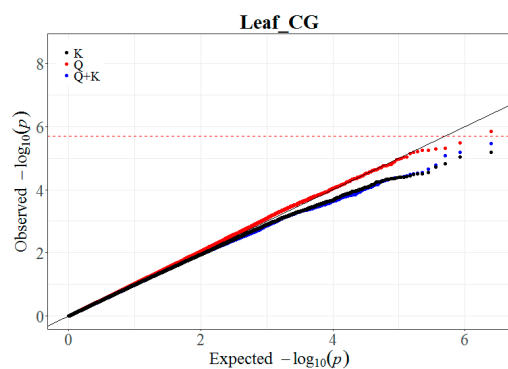

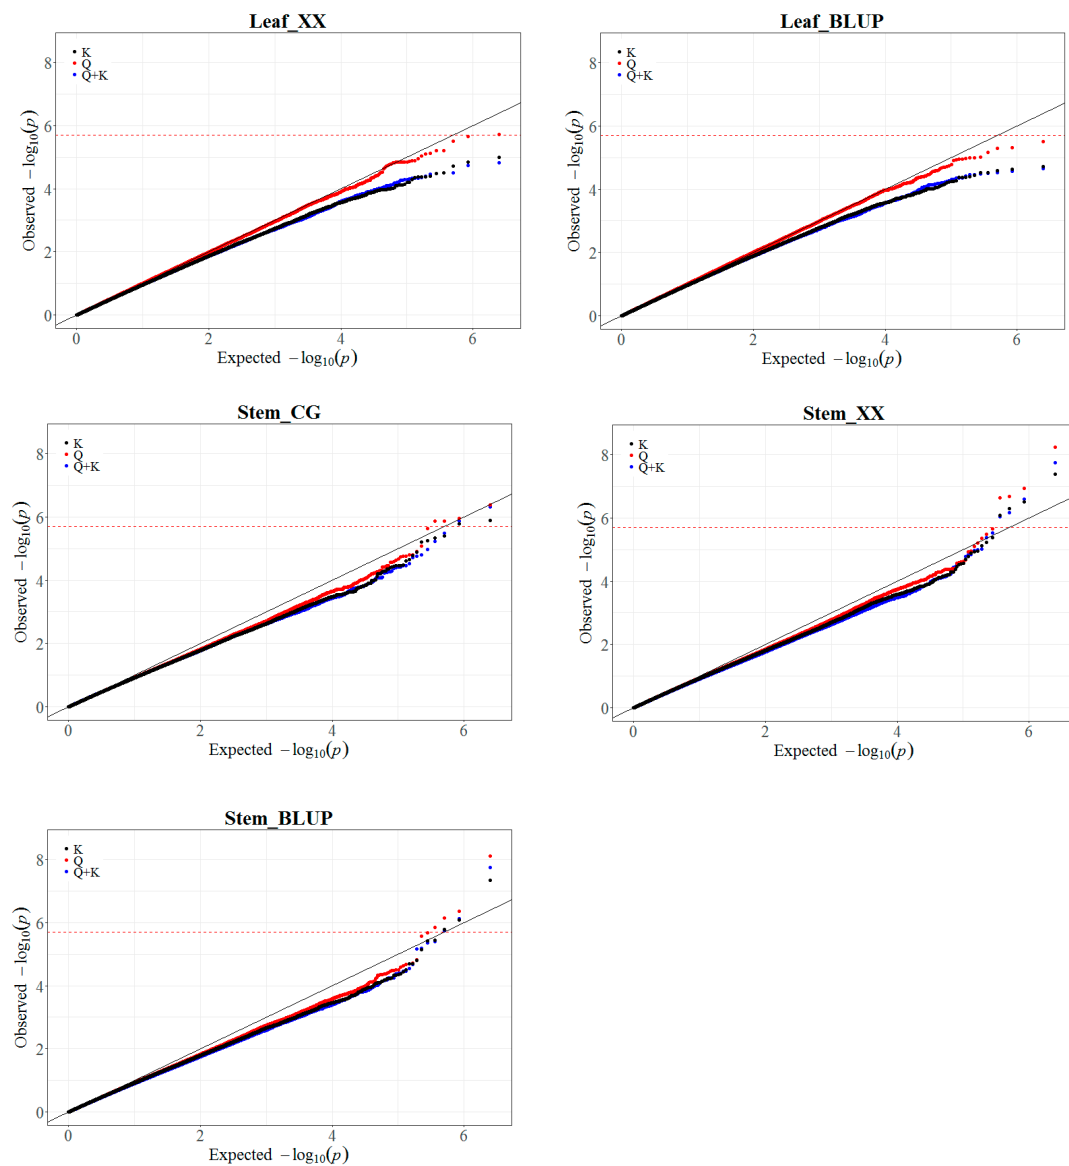

**Figure S3.** Comparison of quantile–quantile (QQ) plots resulting from GWAS, based on 1.25 M SNPs, using three models (Q, K, and Q + K) for mercury content in maize axis, stem, bract, leaf, and kernel in three environments.

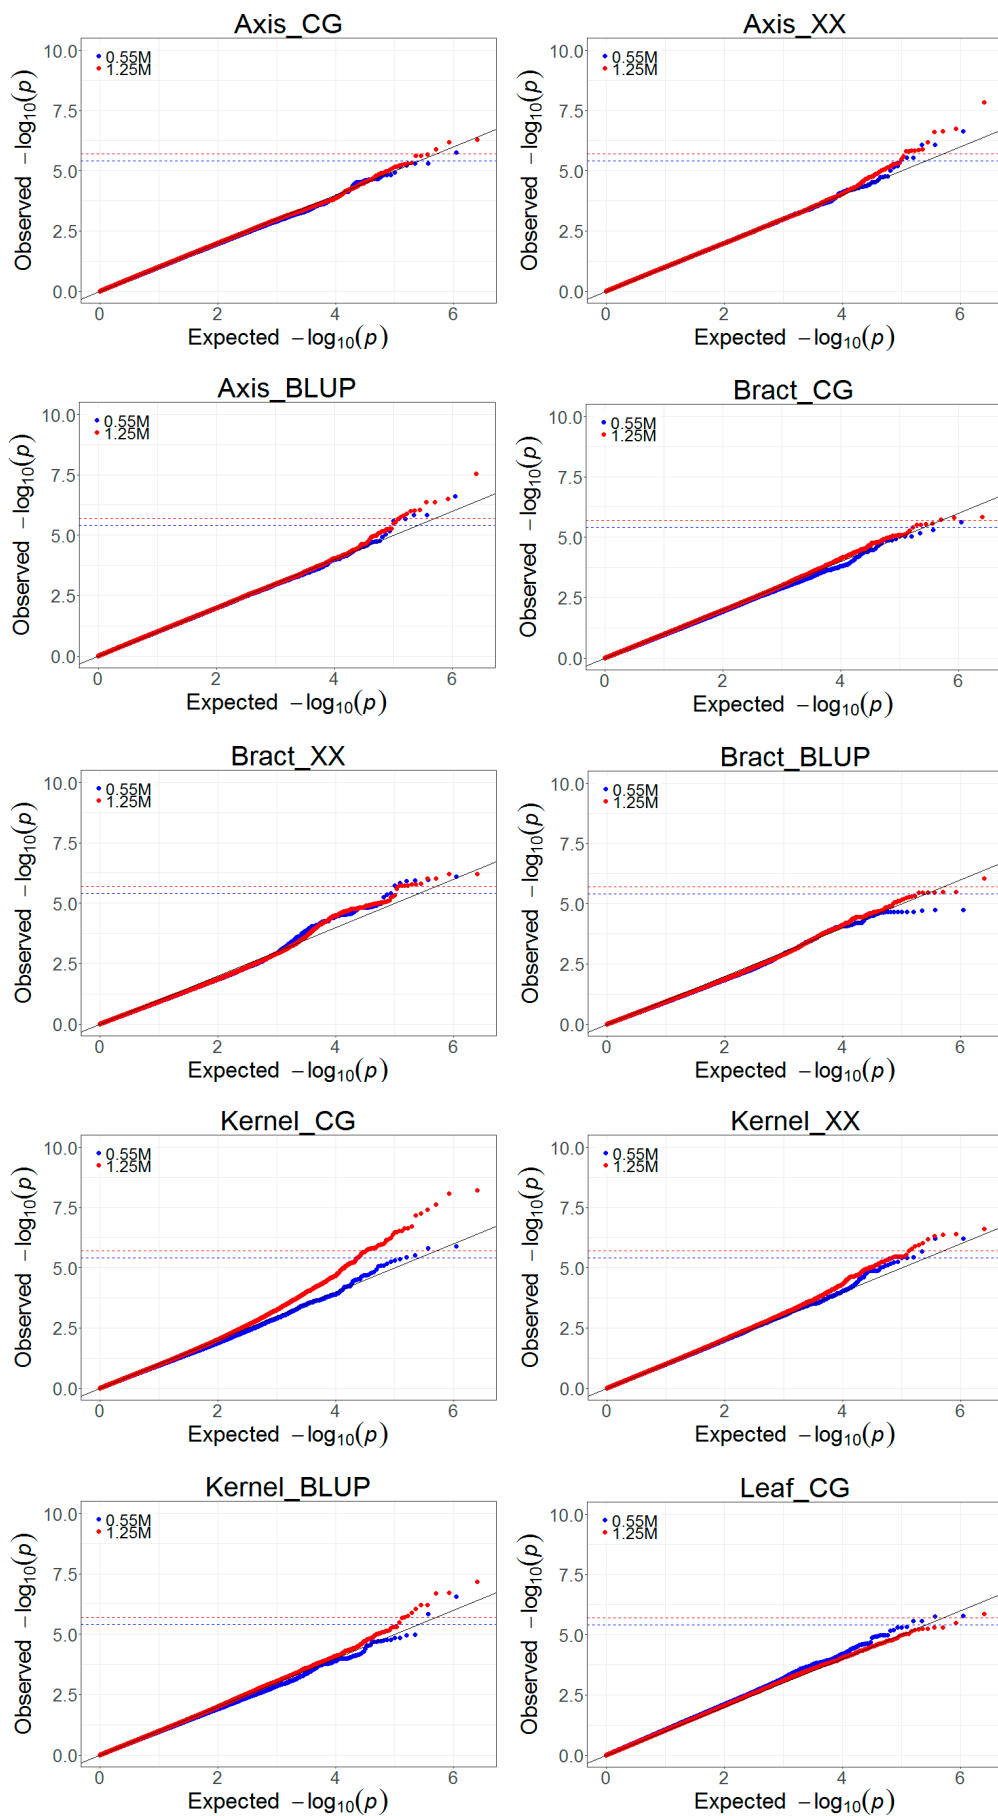

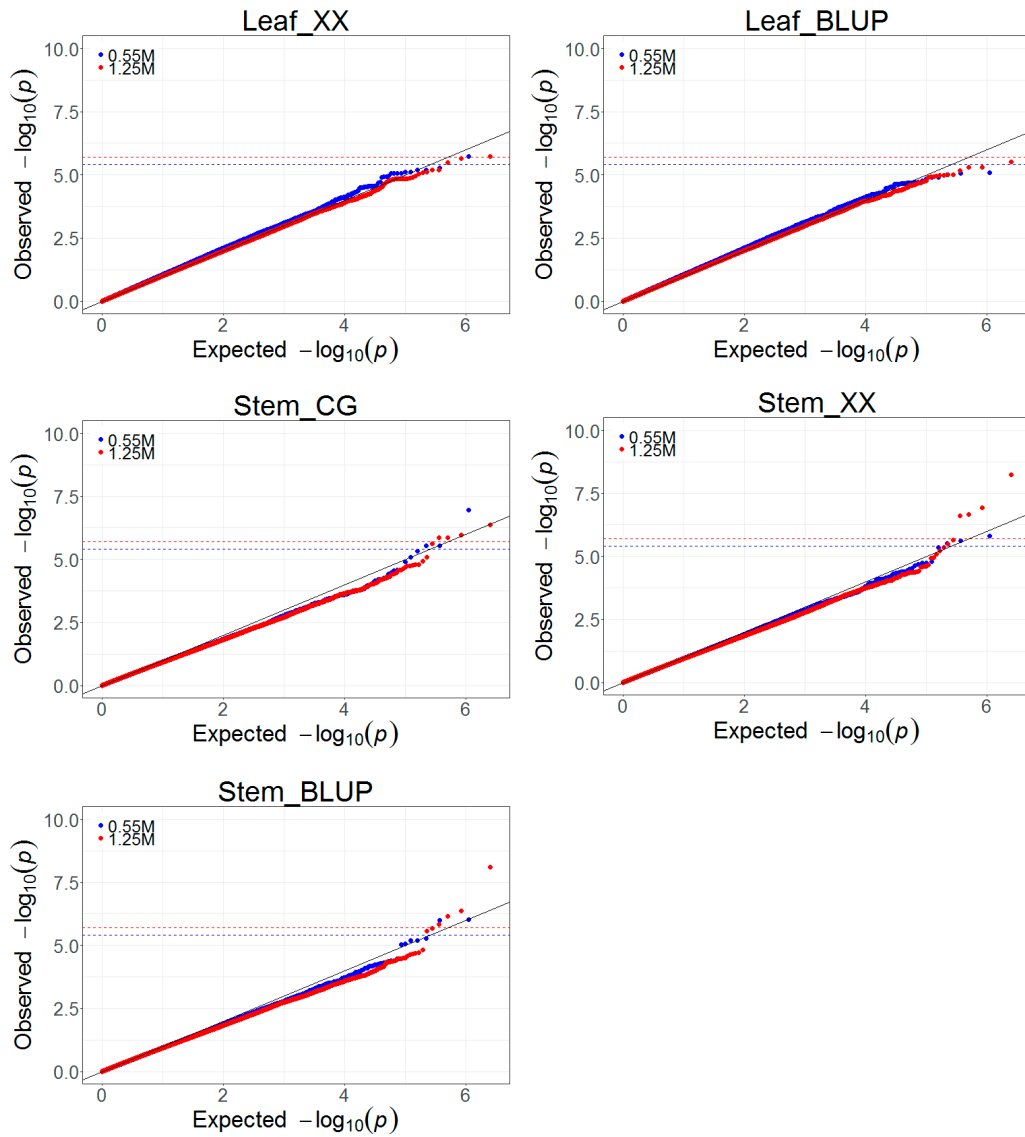

**Figure S4.** Comparison of quantile–quantile (QQ) plots resulting from GWAS, based on 0.55 M SNPs and 1.25 M SNPs, using Q model for mercury content in maize axis, stem, bract, leaf, and kernel in three environments.

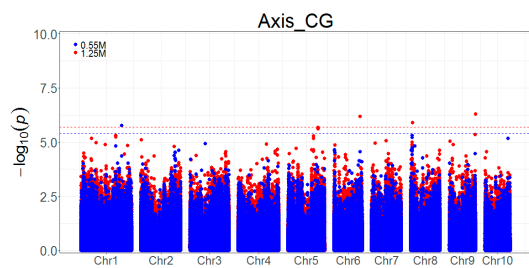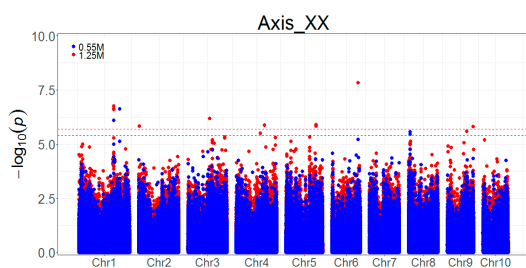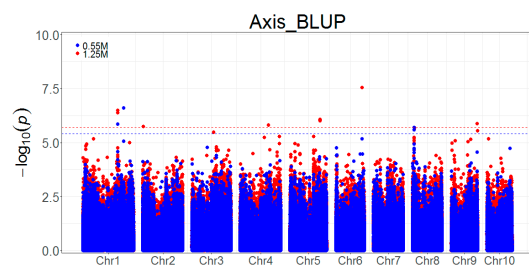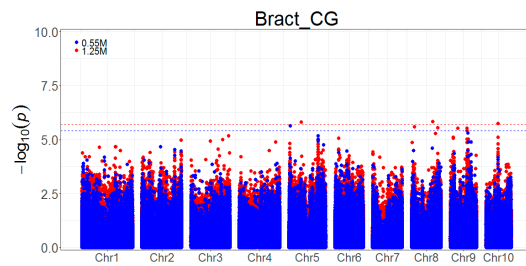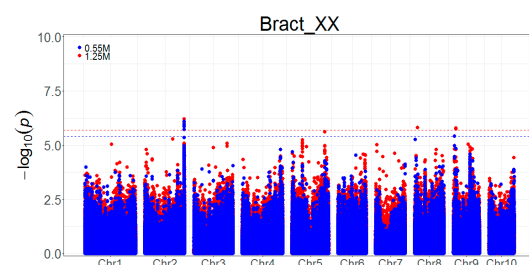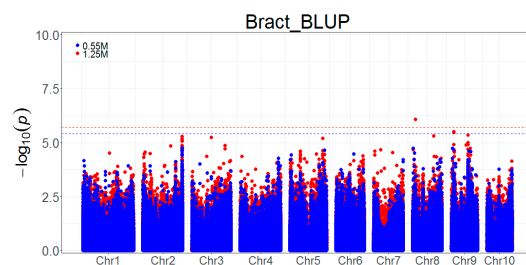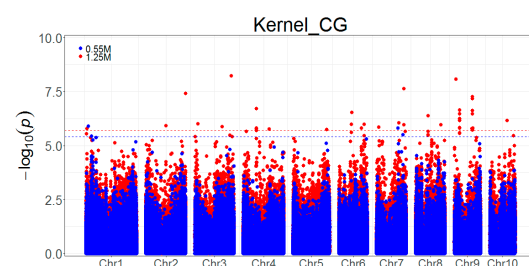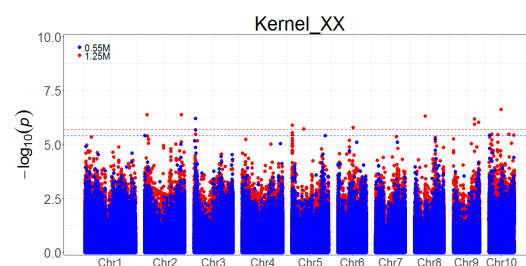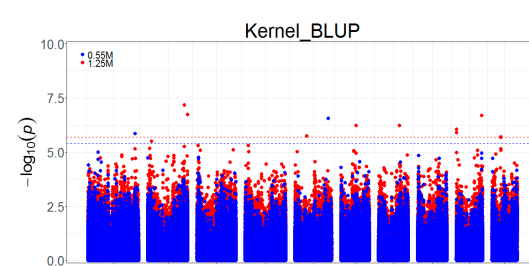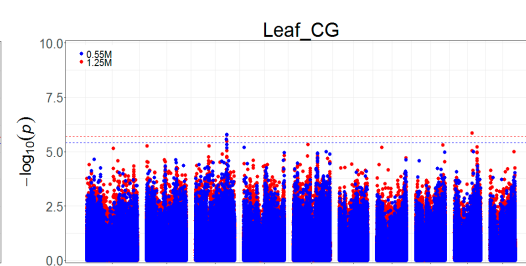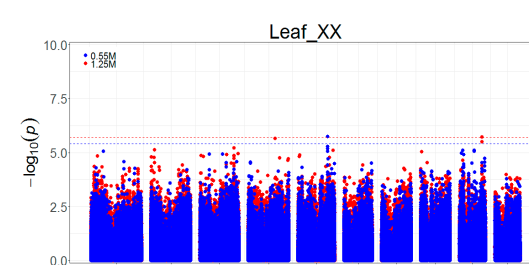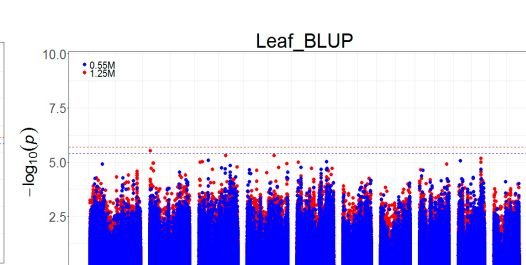



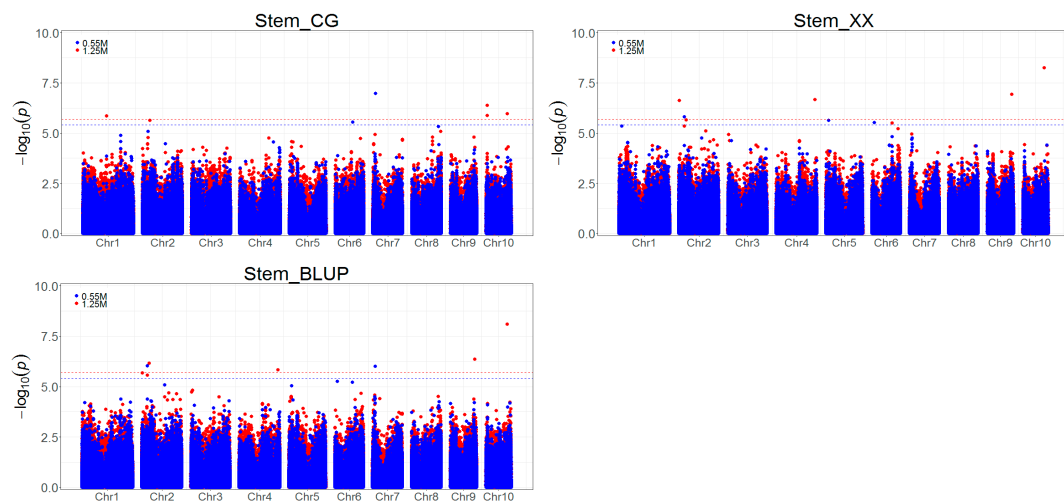

**Figure S5.** Comparison of Manhattan plots resulting from GWAS, based on 0.55 M SNPs and 1.25 M SNPs, using Q model for mercury content in maize axis, stem, bract, leaf, and kernel in three environments.

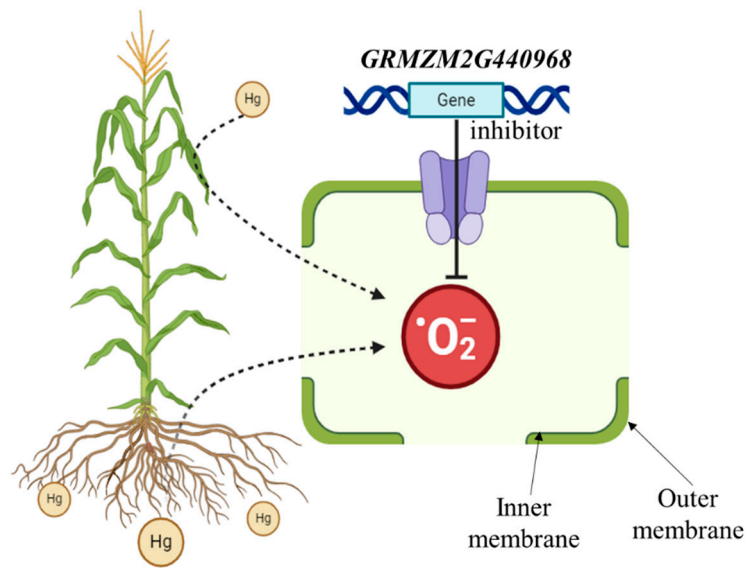

**Figure S6.** Schematic representation of GRMZM2G440968 modulating cysteine protease in response to oxidative stress.
