# Supplementary material for: Identification of Novel QTL for Mercury Accumulation in Maize Using an Enlarged SNP Panel
Source: Genes (Basel). 2024 Feb 19;15(2):257. doi: 10.3390/genes15020257 (PMC10888321; doi:10.3390/genes15020257)
Supplement: Supplementary file 1 [file genes-15-00257-s001.zip › Supplementary Table S1.xlsx]

## Sheet: Pedigree of 230 lines
Table S1. Pedigree information of the 230 inbred lines used in this study.
ID	Lines	SS	NSS	TST	Pedigree	Origin	Subpopulations	Adaptability
1	177	0.1397	0.5795	0.2808	Unkown	China	Mixed	temperate
2	238	0.0263	0.9327	0.041	Unkown	China	NSS	temperate
3	268	0.008	0.6129	0.3791	(shen5003×U8112) F3×32	China	NSS	temperate
4	501	0.001	0.7139	0.2851	Unknown	China	NSS	temperate
5	812	0.8337	0.1633	0.003	Improved from U8112	China	SS	temperate
6	1323	0.5355	0.4182	0.0463	Unknown	China	Mixed	temperate
7	1462	0.1674	0.6866	0.146	Unkown	China	NSS	temperate
8	3411	0.332	0.3097	0.3583	Unknown	China	Mixed	temperate
9	4019	0.3664	0.6059	0.0276	G108×G172	China	NSS	temperate
10	5213	0.0824	0.4218	0.4958	Improved from Mo17	China	Mixed	temperate
11	9642	0.5735	0.1607	0.2658	Unkown	China	Mixed	temperate
12	526018	0.147	0.822	0.031	Unkown	China	NSS	temperate
13	04K5672	0.0083	0.4948	0.4968	Landrace	China	Mixed	temperate
14	04K5702	0.0953	0.6	0.3047	Landrace	China	NSS	temperate
15	05WN230	0.148	0.5649	0.2871	05WN230-1	China	Mixed	temperate
16	384-2	0.19	0.53	0.28	Unknown	China	Mixed	temperate
17	4F1	0.001	0.996	0.003	Improved from Mo17 by radiation	China	NSS	temperate
18	7884-4Ht	0.1153	0.5517	0.333	78-6×H84	China	Mixed	temperate
19	835b	0.0203	0.7418	0.2379	U8112×Ye515	China	NSS	temperate
20	975-12	0.5877	0.005	0.4073	78698×Dan9046	China	Mixed	temperate
21	B110	0.621	0.3737	0.0053	BS13(S)C5	China	SS	temperate
22	B111	0.0027	0.5497	0.4477	BSSS(R)C9	China	Mixed	temperate
23	B151	0.3361	0.4508	0.2131	Unkown	China	Mixed	temperate
24	BGY	0.0417	0.4912	0.4672	Landrace	China	Mixed	temperate
25	BS16	0.1284	0.5408	0.3308	Population BS16	China	Mixed	temperate
26	By4839	0.0103	0.978	0.0117	BHO	China	NSS	temperate
27	By804	0.005	0.9867	0.0083	BHO*	China	NSS	temperate
28	By807	0.0057	0.9883	0.006	BHO	China	NSS	temperate
29	By809	0.0057	0.9893	0.005	BHO	China	NSS	temperate
30	By813	0.0187	0.9743	0.007	BHO	China	NSS	temperate
31	By815	0.013	0.98	0.007	BHO	China	NSS	temperate
32	By843	0.0723	0.9117	0.016	BHO	China	NSS	temperate
33	By855	0.0233	0.947	0.0297	BHO	China	NSS	temperate
34	CF3	0.0387	0.5793	0.382	Unknown	China	Mixed	temperate
35	chuan48-2	0.5365	0.4585	0.005	Synthetic	China	Mixed	temperate
36	CIMBL1	0.12	0.7713	0.1087	derived from BSCB1(R)C9	USA	NSS	tropical/subtropical
37	CIMBL105	0.004	0.076	0.92	(LAMA2002-61-1-B)-B	CIMMYT	TST	tropical/subtropical
38	CIMBL106	0.0257	0.0587	0.9156	(MAS[206/312]-23-2-1-1-BBB/[BETASYN]BC1-10-2-1-#-B)-B	CIMMYT	TST	tropical/subtropical
39	CIMBL109	0.0077	0.1093	0.883	(MAS[206/312]-23-2-1-1-BBB/[BETASYN]BC1-6-1-1-1-1)-B	CIMMYT	TST	tropical/subtropical
40	CIMBL11	0.002	0.005	0.993	(((CML150xCML451)-B-33-3-1-BBx(CML176 x CL-G2501)-B-43-1)-B-38-1-2-1-1-B)-B	CIMMYT	TST	tropical/subtropical
41	CIMBL110	0.0097	0.0573	0.933	(MAS[206/312]-23-2-1-1-BBB/[BETASYN]BC1-9-3-1-1-1)-B	CIMMYT	TST	tropical/subtropical
42	CIMBL112	0.0137	0.0077	0.9787	(MBR C6 AmF9-2-B-#-3-1-BBBBB)-B	CIMMYT	TST	tropical/subtropical
43	CIMBL117	0.0047	0.2041	0.7913	(OBATANPA-SRc1F3(balbulk1)-#bal/[BETASYN]BC1-65-2-1-BB)-B	CIMMYT	TST	tropical/subtropical
44	CIMBL12	0.0257	0.006	0.9683	(((CML150xCML451)-B-33-3-1-BBx(CML176 x CL-G2501)-B-43-1)-B-38-1-2-2-1-B)-B	CIMMYT	TST	tropical/subtropical
45	CIMBL120	0.029	0.0357	0.9353	(P391c2 F22-1-1-2-1-BBB)-B	CIMMYT	TST	tropical/subtropical
46	CIMBL123	0.001	0.0083	0.9907	(P72c1xCML-297 x CL-02410-3-1-1-BBB)-B	CIMMYT	TST	tropical/subtropical
47	CIMBL124	0.0197	0.0143	0.966	(P84c3BcxLine recycle LL TpreAsiaxMIRT F59-2-1-1-1-BB)-B	CIMMYT	TST	tropical/subtropical
48	CIMBL127	0.046	0.087	0.867	(Pop.147-F2#132-1-1-B-2-BBBB)-B	CIMMYT	TST	tropical/subtropical
49	CIMBL133	0.066	0.0227	0.9113	(SAM4(Angola)/[BETASYN]BC1-66-1-3-BBB)-B	CIMMYT	TST	tropical/subtropical
50	CIMBL134	0.0367	0.0067	0.9567	(SAM4(Angola)/[BETASYN]BC1-79-2-3-BB)-B	CIMMYT	TST	tropical/subtropical
51	CIMBL136	0.022	0.03	0.948	(SRR-C1 SA3MH32-4-3-B-1-1-2-BB)-B	CIMMYT	TST	tropical/subtropical
52	CIMBL138	0.0564	0.2584	0.6852	(TX03-1004-168-B)-B	CIMMYT	TST	tropical/subtropical
53	CIMBL140	0.004	0.0537	0.9423	(TX03-1004-20-B)-B	CIMMYT	TST	tropical/subtropical
54	CIMBL142	0.0087	0.2513	0.74	(TX03-1005-15-B)-B	CIMMYT	TST	tropical/subtropical
55	CIMBL143	0.0686	0.4002	0.5312	(TX03-1006-22-B)-B	CIMMYT	Mixed	tropical/subtropical
56	CIMBL144	0.6384	0.3432	0.0183	(TX03-1007-18-B)-B	CIMMYT	SS	tropical/subtropical
57	CIMBL146	0.0077	0.5737	0.4187	(TX03-1008-6-B)-B	CIMMYT	Mixed	tropical/subtropical
58	CIMBL150	0.067	0.2923	0.6407	(TX03-1034-46-B)-B	CIMMYT	TST	tropical/subtropical
59	CIMBL151	0.0773	0.1236	0.7991	(TX03-1034-63-B)-B	CIMMYT	TST	tropical/subtropical
60	CIMBL153	0.0594	0.1394	0.8013	(TX03-1037-3-B)-B	CIMMYT	TST	tropical/subtropical
61	CIMBL154	0.002	0.4578	0.5402	(TZI18-BBBB)-B	CIMMYT	Mixed	tropical/subtropical
62	CIMBL157	0.1257	0.135	0.7393	(ZM305/[BETASYN]BC1-59-1-2-BBB)-B	CIMMYT	TST	tropical/subtropical
63	CIMBL2	0.003	0.007	0.99	Suwan 1	Thailand	TST	tropical/subtropical
64	CIMBL21	0.0107	0.006	0.9833	((CML285/NC300)-B-6-BBBB)-B	CIMMYT	TST	tropical/subtropical
65	CIMBL23	0.0373	0.0157	0.947	((CML454 x CL-02603)-B-7-2-2-BB)-B	CIMMYT	TST	tropical/subtropical
66	CIMBL30	0.0763	0.5806	0.3431	((KU1409/DE3/KU1409)S2-18-2-BB)-B	CIMMYT	Mixed	tropical/subtropical
67	CIMBL32	0.012	0.005	0.983	((KU1409/KU1414-SR/KUI2007)-S2-2-1-BB)-B	CIMMYT	TST	tropical/subtropical
68	CIMBL34	0.002	0.1647	0.8333	((KU1409/KU1414-SR/KVI3)-S2-3-2-BB)-B	CIMMYT	TST	tropical/subtropical
69	CIMBL38	0.002	0.0063	0.9917	((KU1409/KU1414-SR/SC213)-S2-10-1-BB)-B	CIMMYT	TST	tropical/subtropical
70	CIMBL42	0.036	0.121	0.8429	((NC300/Tx772)-B-1-B2-BB)-B	CIMMYT	TST	tropical/subtropical
71	CIMBL45	0.3233	0.1851	0.4915	((Tx601XB104-B/B110XFR2128-B)-BB-4-BBB)-B	CIMMYT	Mixed	tropical/subtropical
72	CIMBL48	0.043	0.2043	0.7527	([DTPYC9-F46-1-2-1-1-B x DTPYC9-F74-1-1-1-1-BB]-B-4-1-B)-B	CIMMYT	TST	tropical/subtropical
73	CIMBL49	0.0063	0.3011	0.6925	([DTPYC9-F65-2-2-1-1-BB x DTPYC9-F65-2-3-1-1-BB]-2-2-2-B)-B	CIMMYT	TST	tropical/subtropical
74	CIMBL57	0.1243	0.0463	0.8294	([ZM305/BETASYN]BC2-133-1-1-BB)-B	CIMMYT	TST	tropical/subtropical
75	CIMBL58	0.0523	0.1026	0.8451	([ZM305/BETASYN]BC2-133-1-2-BBB)-B	CIMMYT	TST	tropical/subtropical
76	CIMBL59	0.0077	0.0973	0.895	([ZM305/BETASYN]BC2-182-1-2-BB)-B	CIMMYT	TST	tropical/subtropical
77	CIMBL60	0.029	0.1963	0.7747	([ZM305/BETASYN]BC2-273-1-1-BB)-B	CIMMYT	TST	tropical/subtropical
78	CIMBL67	0.0413	0.0644	0.8943	(CL-G2606 G26SeqC1-149-1-1-2-1-2-1-BB)-B	CIMMYT	TST	tropical/subtropical
79	CIMBL75	0.001	0.15	0.849	(CML445/[BETASYN]BC1-9-2-3-1-1)-B	CIMMYT	TST	tropical/subtropical
80	CIMBL77	0.0937	0.0113	0.895	(CML489/[BETASYN]BC1-2-#-B)-B	CIMMYT	TST	tropical/subtropical
81	CIMBL8	0.0033	0.2603	0.7363	(((B104/NC300)x(CML-415/B104))-4-2-BB)-B	CIMMYT	TST	tropical/subtropical
82	CIMBL80	0.002	0.0043	0.9937	(CTS013174/SW(S)C11-42-1-BB-1-3-BBBB/Nei9202-B)-B	CIMMYT	TST	tropical/subtropical
83	CIMBL84	0.1323	0.0087	0.859	(DTPYC9-74-1-1-1-1-B)-B	CIMMYT	TST	tropical/subtropical
84	CIMBL85	0.016	0.3431	0.6409	(DTPYC9-F11-2-3-1-2-B)-B	CIMMYT	TST	tropical/subtropical
85	CIMBL86	0.003	0.1346	0.8624	(DTPYC9-F116-2-1-1-1-B)-B	CIMMYT	TST	tropical/subtropical
86	CIMBL87	0.005	0.091	0.904	(DTPYC9-F125-2-8-1-1-B)-B	CIMMYT	TST	tropical/subtropical
87	CIMBL88	0.0547	0.0093	0.936	(DTPYC9-F134-3-1-B)-B	CIMMYT	TST	tropical/subtropical
88	CIMBL91	0.0403	0.3017	0.658	(DTPYC9-F46-1-7-1-1-BBBB)-B	CIMMYT	TST	tropical/subtropical
89	CIMBL92	0.029	0.2363	0.7347	(DTPYC9-F46-3-9-1-2-B)-B	CIMMYT	TST	tropical/subtropical
90	CIMBL93	0.0013	0.2356	0.7631	(DTPYC9-F65-2-3-1-1-BBBBB)-B	CIMMYT	TST	tropical/subtropical
91	CIMBL96	0.001	0.0043	0.9947	(KUI carotenoid syn-FS11-1-1-BBB)-B	CIMMYT	TST	tropical/subtropical
92	CML115	0.1116	0.2926	0.5958	P45C2F151(RIF)-#-5-1-2-BBB	CIMMYT	Mixed	tropical/subtropical
93	CML116	0.5155	0.0043	0.4802	P45(STE)C1F36-5-1-3-1-BB	CIMMYT	Mixed	tropical/subtropical
94	CML118	0.0677	0.3403	0.592	SIYFS3#B1-7-B1-B1#B1	CIMMYT	Mixed	tropical/subtropical
95	CML121	0.0037	0.0033	0.993	(PI218191/PI209135//PI226685/P1317328/3/P47/MPSWCB4) 6-3-1-5-1-B1-B1#B1(MP704/MP78:518)-8-3-4-B1-4-2-3-B1-B1-#B1	CIMMYT	TST	tropical/subtropical
96	CML122	0.045	0.005	0.95	(MP704/MP78:518)-8-3-4-B1-4-2-3-B1-B1#B1	CIMMYT	TST	tropical/subtropical
97	CML130	0.0117	0.009	0.9793	P33C1F118-5-1-4-5-4-B1-B1#B1	CIMMYT	TST	tropical/subtropical
98	CML139	0.002	0.0443	0.9537	MP78:518-15-B1-B1#B1	CIMMYT	TST	tropical/subtropical
99	CML163	0.003	0.1511	0.8459	G26QH31-2-2-#-2-2-1-B-1-BB-#	CIMMYT	TST	tropical/subtropical
100	CML165	0.0027	0.075	0.9223	P66C1F144-3-1-1-BB-1-BB-#	CIMMYT	TST	tropical/subtropical
101	CML170	0.0043	0.053	0.9427	G26QC22H9-3-1-5-1-BB	CIMMYT	TST	tropical/subtropical
102	CML290	0.003	0.0047	0.9923	(P28/TSR)-33-3-7-3-1-BB-F	CIMMYT	TST	tropical/subtropical
103	CML304	0.002	0.0377	0.9603	SINTAMTSR-76-1-2-3-2-BB-F	CIMMYT	TST	tropical/subtropical
104	CML31	0.076	0.0243	0.8997	P27F117-1-4-B-####	CIMMYT	TST	tropical/subtropical
105	CML325	0.018	0.3243	0.6577	P45C6F28-1-2-B*6	CIMMYT	TST	tropical/subtropical
106	CML338	0.0173	0.063	0.9197	P590BF84-3-3-5-3-1-1-B-#-B	CIMMYT	TST	tropical/subtropical
107	CML423	0.0463	0.161	0.7927	G18C19H100#-4-1-1-BBBBBBB	CIMMYT	TST	tropical/subtropical
108	CML479	0.0363	0.013	0.9507	(P24STE-5/24STE-17)-BBBB-###-B-3-B-1-B*4	CIMMYT	TST	tropical/subtropical
109	D047	0.0143	0.5821	0.4035	Landrace	China	Mixed	temperate
110	D863F	0.039	0.8327	0.1283	Unkown	China	NSS	temperate
111	Dan3130	0.035	0.9204	0.0447	American Hybrid P78599	China	NSS	temperate
112	Dan360	0.2667	0.7283	0.005	Lv9×Wide Pod Corn	China	NSS	temperate
113	Dan4245	0.256	0.5377	0.2063	Dan4245-1-3-1-3-1-1	China	Mixed	temperate
114	Dan598	0.1074	0.6696	0.2231	(Dan340×Danhuang11)×(Danhuang02×Dan599)	China	NSS	temperate
115	Dan599	0.0077	0.709	0.2833	American Hybrid P78599	China	NSS	tropical/subtropical
116	DH29	0.462	0.53	0.008	American Hybrid P78599	China	Mixed	temperate
117	DH3732	0.5645	0.1761	0.2594	DH3732-1-1-2-2-1-1	China	Mixed	temperate
118	Dong46	0.2721	0.3845	0.3434	M14	China	Mixed	temperate
119	DSB	0.0207	0.405	0.5743	Landrace	China	Mixed	temperate
120	EN25	0.5158	0.4638	0.0203	Unkown	China	Mixed	temperate
121	ES40	0.1073	0.5468	0.3459	Landrace	China	Mixed	temperate
122	FCD0602	0.0334	0.5766	0.3901	Unkown	China	Mixed	temperate
123	GEMS10	0.6427	0.0033	0.354	2112-02_DK212T_S11_F2S4_9169-Blk20/00	USA	SS	temperate
124	GEMS11	0.6676	0.0117	0.3208	2116-02_DK212T_S11_F2S4_9172-Blk28/00	USA	SS	temperate
125	GEMS12	0.6237	0.0053	0.371	2120-01_DK888_S11_F2S4_9175-Blk28/00	USA	SS	temperate
126	GEMS13	0.6638	0.004	0.3322	2121-04_DK888_S11_F2S4_9178-Blk29/00	USA	SS	temperate
127	GEMS14	0.8146	0.004	0.1814	2127-01_DK888_S11_F2S4_9181-Blk21/00	USA	SS	temperate
128	GEMS15	0.003	0.0063	0.9907	2131-01_DK888_S11_F2S4_9184-Blk20/00	USA	TST	temperate
129	GEMS17	0.71	0.0047	0.2853	2142-01_DK888_S11_F2S4_9190-Blk19/00	USA	SS	temperate
130	GEMS19	0.002	0.0047	0.9933	2146-01_DK888_S11_F2S4_9196-Blk29/00	USA	TST	temperate
131	GEMS21	0.964	0.003	0.033	2152-02_DK888_S11_F2S4_65/97-Blk/97-99	USA	SS	temperate
132	GEMS25	0.002	0.4413	0.5567	2226-02_XL370A_S11_F2S4_9211-Blk25/00	USA	Mixed	temperate
133	GEMS27	0.0567	0.387	0.5563	2250-01_XL370A_S11_F2S4_9214-Blk21/00	USA	Mixed	temperate
134	GEMS28	0.0747	0.358	0.5673	2250-02_XL370A_S11_F2S4_3363-Blk03/00	USA	Mixed	temperate
135	GEMS29	0.0527	0.4055	0.5418	2253-01_XL370A_S11_F2S4_9220-Blk24/00	USA	Mixed	temperate
136	GEMS3	0.0317	0.395	0.5733	2011-01_SE32-S17_F2S4_9148-Blk22/00	USA	Mixed	temperate
137	GEMS30	0.0113	0.2397	0.749	2258-03_XL380_S11_F2S4_71/97-Blk/98	USA	TST	temperate
138	GEMS31	0.0193	0.0487	0.932	2282-01_XL380_S11_F2S4_9226-Blk26/00	USA	TST	temperate
139	GEMS32	0.0987	0.3878	0.5135	2283-01_XL380_S11_F2S4_9229-Blk20/00	USA	Mixed	temperate
140	GEMS36	0.0233	0.6962	0.2804	PE001n16F2S2-176	USA	NSS	temperate
141	GEMS39	0.0283	0.6986	0.2731	PE001n16F2S2-239	USA	NSS	temperate
142	GEMS42	0.0173	0.6556	0.3271	PE001n16F2S2-705	USA	NSS	temperate
143	GEMS44	0.085	0.5862	0.3288	CH05015:N12-140-1-B-B	USA	Mixed	temperate
144	GEMS48	0.0887	0.7726	0.1387	DKXL370:N11a20-31-1-B-B	USA	NSS	temperate
145	GEMS49	0.674	0.3007	0.0253	DKB844:S1601-512-1-B	USA	SS	temperate
146	GEMS5	0.668	0.0127	0.3193	2086-01_DK212T_S11_F2S4_9154-Blk20/00	USA	SS	temperate
147	GEMS51	0.7198	0.1438	0.1364	CUBA164:S2008a-83-1-B	USA	SS	temperate
148	GEMS53	0.6957	0.1117	0.1927	CUBA164:S15-192-2-B	USA	SS	temperate
149	GEMS55	0.7761	0.0736	0.1503	ARI16035:S02-443-1-B-B	USA	SS	temperate
150	GEMS58	0.004	0.9027	0.0933	ARI01150:N04-696-1-B	USA	NSS	temperate
151	GEMS6	0.7014	0.0053	0.2932	2088-01_DK212T_S11_F2S4_9157-Blk29/00	USA	SS	temperate
152	GEMS61	0.0473	0.1767	0.776	ARI16026:S17-10-1-B-B	USA	TST	temperate
153	GEMS63	0.9773	0.0033	0.0193	CUBA164:S1511b-325-001	USA	SS	temperate
154	Gy220	0.0503	0.865	0.0847	AIHO*	China	NSS	temperate
155	Gy237	0.0033	0.9177	0.079	AIHO	China	NSS	temperate
156	Gy246	0.054	0.8463	0.0997	AIHO	China	NSS	temperate
157	Gy462	0.029	0.8707	0.1003	AIHO	China	NSS	temperate
158	Gy923	0.0387	0.94	0.0213	AIHO	China	NSS	temperate
159	HB	0.004	0.493	0.503	Huojiabaimaya	China	Mixed	temperate
160	Hu803	0.6167	0.38	0.0033	U8112×Shen5003	China	SS	temperate
161	IRF314	0.01	0.9587	0.0313	(PA91/LH98A)-6-420-64-2-1-3-1-1-1	China	NSS	temperate
162	J4112	0.1617	0.401	0.4373	A619×U8112	China	Mixed	temperate
163	JH59	0.0057	0.9893	0.005	American Hybrid P78599	China	NSS	temperate
164	JH96C	0.0877	0.7186	0.1937	Synthetic	China	NSS	temperate
165	Ji846	0.0047	0.9883	0.007	Ji63×Mo17	China	NSS	temperate
166	Ji853	0.4607	0.5353	0.004	(HuangZaoSi×Zi330)×Zi330	China	Mixed	temperate
167	JY01	0.1094	0.7723	0.1184	JiYan01-3-2-2-1-5-1	China	NSS	temperate
168	K10	0.07	0.6203	0.3098	(Chang3×Shen5003)×Chang3	China	NSS	temperate
169	K14	0.05	0.8746	0.0754	Shen5005×6917	China	NSS	temperate
170	K22	0.1557	0.8193	0.025	K11×Ye478	China	NSS	temperate
171	L3180	0.1453	0.5245	0.3302	Foreign hybrid	China	Mixed	temperate
172	Liao159	0.2365	0.452	0.3115	Unkown	China	Mixed	temperate
173	Liao5114	0.108	0.4673	0.4247	Tie7922×Shen5003	China	Mixed	temperate
174	LK11	0.001	0.9933	0.0057	Mo17×Zi330	China	NSS	temperate
175	Lv28	0.0837	0.6937	0.2227	LvDaHongGu	China	NSS	temperate
176	Lx9801	0.006	0.6641	0.3299	Xi502×H21	China	NSS	temperate
177	LXN	0.056	0.6438	0.3002	Landrace	China	NSS	temperate
178	LY042	0.1523	0.8367	0.011	Unkown	China	NSS	temperate
179	M165	0.1756	0.6808	0.1436	Unknown	China	NSS	temperate
180	MN	0.1043	0.4362	0.4595	Landrace	China	Mixed	temperate
181	MO113	0.0027	0.9484	0.049	Unknown	China	NSS	temperate
182	Mo17	0.0013	0.9957	0.003	187-2×C103	China	NSS	temperate
183	Nan21-3	0.048	0.5258	0.4261	Jugoslavian Hybrid	China	Mixed	tropical/subtropical
184	P178	0.0053	0.8263	0.1684	American Hybrid P78599	China	NSS	tropical/subtropical
185	Qi205	0.1438	0.3999	0.4563	(VeiAi141×ZhongXi017)×Population 70	China	Mixed	temperate
186	Qi319	0.005	0.7686	0.2264	American Hybrid P78599	China	NSS	tropical/subtropical
187	R08	0.072	0.7368	0.1913	American Hybrid P78641	China	NSS	temperate
188	Ry713	0.147	0.6135	0.2396	RYD	China	NSS	temperate
189	S37	0.1013	0.0707	0.828	Suwan1	China	TST	tropical/subtropical
190	Shen137	0.002	0.7262	0.2718	American Hybrid 6JK611	China	NSS	tropical/subtropical
191	Shen5003	0.0754	0.8803	0.0443	American Single-cross 3147	China	NSS	temperate
192	Si444	0.0087	0.6118	0.3795	A619×HuangZaoSi	China	NSS	temperate
193	SW92E114	0.0077	0.075	0.9173	Landrace	China	TST	temperate
194	Sy1052	0.164	0.6907	0.1453	Syn.D.O	China	NSS	temperate
195	Sy1077	0.0447	0.5417	0.4137	Syn.D.O	China	Mixed	temperate
196	Sy3073	0.0656	0.8411	0.0933	Syn.D.O	China	NSS	temperate
197	Sy999	0.1227	0.726	0.1513	Syn.D.O	China	NSS	temperate
198	Tian77	0.2259	0.5655	0.2086	(HuangXiao162×Mei1865)×(187-2×Nan55)	China	Mixed	temperate
199	Tie7922	0.7593	0.2387	0.002	American Hybrid 3382	China	SS	temperate
200	TT16	0.443	0.553	0.004	TianTai16-1-3-1-2-2-2	China	Mixed	temperate
201	TY1	0.426	0.1953	0.3787	TY30331-2-4-2-1-3-2	China	Mixed	temperate
202	TY10	0.1643	0.3072	0.5285	TY30331-2-8-1-1-3-2	China	Mixed	temperate
203	TY11	0.056	0.3567	0.5873	TY30331-2-8-1-2-1-1	China	Mixed	temperate
204	TY2	0.1809	0.3426	0.4765	TY30331-2-4-2-2-1-1	China	Mixed	temperate
205	TY3	0.0287	0.4807	0.4907	TY30331-2-4-2-2-2-1	China	Mixed	temperate
206	TY4	0.115	0.4083	0.4767	TY30331-2-4-2-2-2-2	China	Mixed	temperate
207	TY5	0.0853	0.4312	0.4835	TY30331-2-4-2-2-3-1	China	Mixed	temperate
208	TY6	0.0053	0.4797	0.515	TY30331-2-5-1-2-3-2	China	Mixed	temperate
209	TY7	0.0493	0.4232	0.5275	TY30331-2-5-2-1-1-3	China	Mixed	temperate
210	TY8	0.077	0.3349	0.5881	TY30331-2-7-1-2-1-1	China	Mixed	temperate
211	U8112	0.842	0.1533	0.0047	American Hybrid 3382	China	SS	temperate
212	W138	0.001	0.994	0.005	Unknown	China	NSS	temperate
213	WH413	0.3336	0.1779	0.4885	HuangZaoSi×WenQing1331	China	Mixed	temperate
214	WMR	0.081	0.3343	0.5847	Landrace	China	Mixed	temperate
215	Wu109	0.3861	0.1811	0.4328	XiDan7	China	Mixed	temperate
216	Xi502	0.003	0.7154	0.2816	Dan340×HuangZaoSi	China	NSS	temperate
217	Xun971	0.131	0.5317	0.3373	Landrace	China	Mixed	temperate
218	Ye478	0.1283	0.546	0.3257	U8112×Shen5003	China	Mixed	temperate
219	Ye52106	0.1333	0.7137	0.153	(Ye1075×Ye106)×AiJin525	China	NSS	temperate
220	Ye8001	0.3456	0.3635	0.2909	Ye488×3189	China	Mixed	temperate
221	Z2018F	0.0856	0.5805	0.3339	Zheng2018F2*698-3-1-2-1-1	China	Mixed	temperate
222	Zheng28	0.0473	0.7357	0.217	Ye478×Tuxpeno	China	NSS	temperate
223	Zheng29	0.122	0.5945	0.2834	Shen5003	China	Mixed	temperate
224	Zheng35	0.1477	0.5787	0.2737	Unkown	China	Mixed	temperate
225	Zheng58	0.2377	0.7563	0.006	Variant plants from Ye478	China	NSS	temperate
226	Zheng653	0.068	0.916	0.016	(Shen5003×Zong31)×Shen5003	China	NSS	temperate
227	Zhong69	0.1659	0.5953	0.2388	American Hybrid P78599	China	Mixed	temperate
228	Zong31	0.0083	0.8653	0.1263	Synthetic	China	NSS	temperate
229	ZZ01	0.0137	0.7636	0.2227	American Hybrid P78641	China	NSS	temperate
230	ZZ03	0.052	0.9373	0.0107	Unkown	China	NSS	temperate
