# Supplementary material for: Identification of Novel QTL for Mercury Accumulation in Maize Using an Enlarged SNP Panel
Source: Genes (Basel). 2024 Feb 19;15(2):257. doi: 10.3390/genes15020257 (PMC10888321; doi:10.3390/genes15020257)
Supplement: Supplementary file 1 [file genes-15-00257-s001.zip › Supplementary Table S2.xlsx]

## Sheet: Sheet1
Table S2. List of candidate genes and their annotations.
ID	Chr.	Position	Trait	Location	SNP	P value	R2	Gene	Previous report	Annotation
49	1	5013841	Kernel	CG	chr1.S_5013841	1.67e-06	0.0971454	GRMZM2G159431		DNA binding||homeobox protein HD1
								GRMZM2G070242		integral to membrane
								AC194428.3_FG006		NA
								GRMZM2G070047		post-translational protein modification||
								AC194428.3_FG007		metal ion binding
								GRMZM2G159470		hypothetical protein LOC100381575
								GRMZM2G461777		Clone 695636 mRNA sequence
								GRMZM2G159427		Clone cta1n.pk0011.c3, mRNA sequence
								GRMZM2G070259		nucleic acid binding
104	1	141037537	Stem	CG	chr1.S_141037537	1.4e-06	0.106977	GRMZM2G130232		hypothetical protein LOC100192612
1	1	206512290	Axis	BLUP	chr1.S_206512290	4.25e-07	0.105588	GRMZM2G119761		26S proteasome non-ATPase regulatory subunit 3
								GRMZM5G818549		NA
								GRMZM2G119812		NA
14	1	206512290	Axis	XX	chr1.S_206512290	2.5e-07	0.109531	GRMZM2G119761		26S proteasome non-ATPase regulatory subunit 3
								GRMZM5G818549		NA
								GRMZM2G119812		NA
2	1	206512615	Axis	BLUP	chr1.S_206512615	4.18e-07	0.105009	GRMZM2G119761		26S proteasome non-ATPase regulatory subunit 3
								GRMZM5G818549		NA
								GRMZM2G119812		NA
15	1	206512615	Axis	XX	chr1.S_206512615	2.37e-07	0.109182	GRMZM2G119761		26S proteasome non-ATPase regulatory subunit 3
								GRMZM5G818549		NA
								GRMZM2G119812		NA
3	1	206513913	Axis	BLUP	chr1.S_206513913	3.24e-07	0.106925	GRMZM2G119761		26S proteasome non-ATPase regulatory subunit 3
								GRMZM5G818549		NA
								GRMZM2G119812		NA
16	1	206513913	Axis	XX	chr1.S_206513913	1.76e-07	0.111421	GRMZM2G119761		26S proteasome non-ATPase regulatory subunit 3
								GRMZM5G818549		NA
								GRMZM2G119812		NA
4	2	3598397	Axis	BLUP	chr2.S_3598397	1.79e-06	0.22551	GRMZM2G365152		NA
								GRMZM2G061745		hypothetical protein LOC100274928
								GRMZM2G365166		NA
								GRMZM2G061672		Cofactor required for Sp1 transcriptional activation subunit 9
								GRMZM2G365162		TSA: Zea mays contig30747, mRNA sequence
								GRMZM2G062354		Clone 299191 mRNA sequence
17	2	3598397	Axis	XX	chr2.S_3598397	1.48e-06	0.228082	GRMZM2G365152		NA
								GRMZM2G061745		hypothetical protein LOC100274928
								GRMZM2G365166		NA
								GRMZM2G061672		Cofactor required for Sp1 transcriptional activation subunit 9
								GRMZM2G365162		TSA: Zea mays contig30747, mRNA sequence
								GRMZM2G062354		Clone 299191 mRNA sequence
109	2	3735726	Stem	XX	chr2.S_3735726	2.4e-07	0.152153	GRMZM2G150487		NA
								GRMZM2G150468		membrane
								GRMZM2G009413		hypothetical protein LOC100216860
								GRMZM2G150496		ATP binding
89	2	13290937	Kernel	XX	chr2.S_13290937	4.14e-07	0.114488	GRMZM2G038722		cytoplasm
								GRMZM2G035719		hypothetical protein LOC100382832
								GRMZM2G038714		Clone 501105 mRNA sequence
								GRMZM2G342039		protein binding
								GRMZM2G342033		defense response
								GRMZM2G035685		Hypothetical protein LOC100192954
101	2	42366658	Stem	BLUP	chr2.S_42366658	7.14e-07	0.111345	GRMZM2G489504		NA
								GRMZM2G012328		ATP binding
								GRMZM2G315401		carbohydrate bindin
								GRMZM2G012404		aminoacyl-tRNA ligase activity
51	2	120716071	Kernel	CG	chr2.S_120716071	1.19e-06	0.123661	GRMZM2G071654		Clone 425914 mRNA sequence
41	2	216114756	Kernel	BLUP	chr2.S_216114756	6.96e-08	0.191489	GRMZM2G422171		NA
								GRMZM2G422212		NA
90	2	216114756	Kernel	XX	chr2.S_216114756	4.22e-07	0.169848	GRMZM2G422171		NA
								GRMZM2G422212		NA
29	2	233763765	Bract	XX	chr2.S_233763765	9.29e-07	0.0906096	GRMZM2G340130		Transcribed locus
								GRMZM5G878490		Hypothetical protein LOC100194048
								GRMZM2G021051		hypothetical protein LOC100217010
								AC209768.3_FG005		nucleic acid binding||nucleus
								GRMZM2G037923		ATP binding
								GRMZM2G020898		carbohydrate metabolic process
								GRMZM2G022206		post-translational protein modification
								GRMZM2G037614		3-methyl-2-oxobutanoate dehydrogenase
30	2	233764281	Bract	XX	chr2.S_233764281	9.5e-07	0.0981781	GRMZM2G340130		Transcribed locus
								GRMZM5G878490		Hypothetical protein LOC100194048
								GRMZM2G021051		hypothetical protein LOC100217010
								AC209768.3_FG005		nucleic acid binding||nucleus
								GRMZM2G037923		ATP binding
								GRMZM2G020898		carbohydrate metabolic process
								GRMZM2G022206		post-translational protein modification
								GRMZM2G037614		3-methyl-2-oxobutanoate dehydrogenase
31	2	234094563	Bract	XX	chr2.S_234094563	6.31e-07	0.0953082	GRMZM5G817777		hydrolase activity||metabolic process
								GRMZM5G877941		catalytic activity||FAD binding
								GRMZM5G860072		cytoplasm||integral to membrane
								GRMZM2G012546		hydrolase activity
32	2	234095018	Bract	XX	chr2.S_234095018	6.2e-07	0.0950101	GRMZM5G817777		hydrolase activity||metabolic process
								GRMZM5G877941		catalytic activity
								GRMZM5G860072		cytoplasm
								GRMZM2G012546		hydrolase activity
42	2	236289710	Kernel	BLUP	chr2.S_236289710	1.88e-07	0.128391	GRMZM2G104032		cell wall biogenesis
								GRMZM2G379575		hypothetical protein LOC100279081
								GRMZM2G378515		protein domain specific binding
								GRMZM2G083572		hypothetical protein LOC100381793
								GRMZM2G103955		Hypothetical protein LOC100193555
								GRMZM2G402239		protein binding
52	2	236289710	Kernel	CG	chr2.S_236289710	3.88e-08	0.142446	GRMZM2G104032		cell wall biogenesis
								GRMZM2G379575		hypothetical protein LOC100279081
								GRMZM2G378515		protein domain specific binding
								GRMZM2G083572		hypothetical protein LOC100381793
								GRMZM2G103955		Hypothetical protein LOC100193555
								GRMZM2G402239		protein binding
54	3	16648031	Kernel	CG	chr3.S_16648031	1.01e-06	0.101891	GRMZM2G139965		NA
								GRMZM2G140032		G-protein coupled receptor protein signaling pathway
18	3	128934811	Axis	XX	chr3.S_128934811	6.56e-07	0.18979	GRMZM2G122481		Cytochrome c oxidase polypeptide Vc
								GRMZM2G122443		LOC100283315
								GRMZM2G160902		DNA binding
53	3	161639760	Kernel	CG	chr3.S_161639760	1.38e-06	0.130304	GRMZM2G087032		hypothetical protein LOC100194377
								GRMZM2G086940		hypothetical protein LOC100277337
55	3	216884001	Kernel	CG	chr3.S_216884001	6.02e-09	0.172775	GRMZM2G147774		electron carrier activity
								GRMZM2G147752		Cytochrome P450 CYP72A124
57	4	77610945	Kernel	CG	chr4.S_77610945	1.69e-06	0.109529	GRMZM2G122076		DNA binding
58	4	77621039	Kernel	CG	chr4.S_77621039	1.93e-07	0.128082	GRMZM2G122076		DNA binding
59	4	79063926	Kernel	CG	chr4.S_79063926	1.59e-06	0.120322	GRMZM2G107844		Transcribed locus
								GRMZM5G851815		Full-length cDNA clone ZM_BFc0140F01
60	4	79071337	Kernel	CG	chr4.S_79071337	1.74e-06	0.12008	GRMZM2G107844		Transcribed locus
								GRMZM5G851815		Full-length cDNA clone ZM_BFc0140F01||metabolic process||oxidoreductase activity||Putative uncharacterized protein
5	4	167403585	Axis	BLUP	chr4.S_167403585	1.54e-06	0.1769	GRMZM2G125943		ATP binding
								GRMZM2G125991		carbohydrate metabolic process
								GRMZM2G029859		GTP binding
19	4	167403585	Axis	XX	chr4.S_167403585	1.33e-06	0.1779	GRMZM2G125943		histidine kinase
								GRMZM2G125991		hydrolase activity, hydrolyzing O-glycosyl compounds
								GRMZM2G029859		GTP binding||GTPase activity
102	4	230217136	Stem	BLUP	chr4.S_230217136	1.46e-06	0.187023	AC208724.3_FG001		NA
								GRMZM2G161969		acyltransferase activity
110	4	230217136	Stem	XX	chr4.S_230217136	2.14e-07	0.213928	AC208724.3_FG001		NA
								GRMZM2G161969		acyltransferase activity
91	5	2356674	Kernel	XX	chr5.S_2356674	1.31e-06	0.0963933	GRMZM2G002825		actin-depolymerizing factor 3
								GRMZM2G002805		zinc ion binding
								GRMZM2G002815		zinc finger DNA-binding protein
								GRMZM2G144188		zinc ion binding
								GRMZM2G144172		zinc ion binding
								GRMZM2G003068		zinc ion binding
								GRMZM2G003108		CRAL/TRIO domain containing protein
43	5	71102788	Kernel	BLUP	chr5.S_71102788	1.81e-06	0.180093	GRMZM2G059877		NA
43	5	71102788	Kernel	BLUP	chr5.S_71102788	1.81e-06	0.180093	AC196025.3_FG001		NA
								AC196025.3_FG002		NA
								GRMZM2G090689		NA
92	5	71102788	Kernel	XX	chr5.S_71102788	1.94e-06	0.17653	GRMZM2G059877		NA
92	5	71102788	Kernel	XX	chr5.S_71102788	1.94e-06	0.17653	AC196025.3_FG001		NA
								AC196025.3_FG002		NA
								GRMZM2G090689		NA
27	5	73046209	Bract	CG	chr5.S_73046209	1.55e-06	0.15622	GRMZM2G030013		hypothetical protein LOC100192689
								GRMZM2G029087		Bax inhibitor 1
								GRMZM2G029065		alpha1-adrenergic receptor activity
								GRMZM2G029879		Clone 344233 mRNA sequence
6	5	178895715	Axis	BLUP	chr5.S_178895715	1.01e-06	0.0992425	GRMZM2G109959		glycine-rich cell wall structural protein
								GRMZM2G543051		NA
								GRMZM2G101519		Clone EL01N0504B05.d mRNA sequence
20	5	178895715	Axis	XX	chr5.S_178895715	1.52e-06	0.0961296	GRMZM2G109959		glycine-rich cell wall structural protein
								GRMZM2G543051		NA
								GRMZM2G101519		Clone EL01N0504B05.d mRNA sequence
7	5	178895723	Axis	BLUP	chr5.S_178895723	8.71e-07	0.0995194	GRMZM2G109959		glycine-rich cell wall structural protein
								GRMZM2G543051		NA
								GRMZM2G101519		Clone EL01N0504B05.d mRNA sequence
21	5	178895723	Axis	XX	chr5.S_178895723	1.31e-06	0.0964244	GRMZM2G109959		glycine-rich cell wall structural protein
								GRMZM2G543051		NA
								GRMZM2G101519		Clone EL01N0504B05.d mRNA sequence
8	5	178895729	Axis	BLUP	chr5.S_178895729	9.63e-07	0.0992435	GRMZM2G109959		glycine-rich cell wall structural protein
								GRMZM2G543051		NA
								GRMZM2G101519		Clone EL01N0504B05.d mRNA sequence
22	5	178895729	Axis	XX	chr5.S_178895729	1.43e-06	0.0961821	GRMZM2G109959		glycine-rich cell wall structural protein
								GRMZM2G543051		NA
								GRMZM2G101519		Clone EL01N0504B05.d mRNA sequence
61	5	200680160	Kernel	CG	chr5.S_200680160	1.85e-06	0.100114	GRMZM2G150374		Full-length cDNA clone ZM_BFb0133D20||membrane
								GRMZM2G449796		NA
								GRMZM2G179147		electron carrier activity
								GRMZM2G150363		bacterial-type flagellum basal body, distal rod, P ring
65	6	77470376	Kernel	CG	chr6.S_77470376	3.02e-07	0.124544	AC194853.1_FG002		NA
								AC210596.3_FG003		calcium ion binding
								AC210596.3_FG004		calcium ion binding
66	6	77470901	Kernel	CG	chr6.S_77470901	2.99e-07	0.124586	AC194853.1_FG002		NA
								AC210596.3_FG003		calcium ion binding
								AC210596.3_FG004		calcium ion binding
44	6	88994234	Kernel	BLUP	chr6.S_88994234	6.15e-07	0.145925	AC207260.3_FG004		NA
								GRMZM2G139675		Putative uncharacterized protein
								GRMZM2G439598		Putative uncharacterized protein
								GRMZM2G139657		auxin-independent growth promoter-like protein
93	6	88994234	Kernel	XX	chr6.S_88994234	1.65e-06	0.131883	AC207260.3_FG004		NA
								GRMZM2G139675		Putative uncharacterized protein
								GRMZM2G439598		Putative uncharacterized protein
								GRMZM2G139657		auxin-independent growth promoter-like protein
62	6	133476924	Kernel	CG	chr6.S_133476924	1.56e-06	0.107505	GRMZM2G062333		ATP binding
63	6	150172041	Kernel	CG	chr6.S_150172041	1.06e-06	0.124608	GRMZM2G122410		catalytic activity
9	6	155668107	Axis	BLUP	chr6.S_155668107	2.82e-08	0.127073	GRMZM2G566873		NA
								GRMZM2G140805		homoiothermy
								GRMZM2G440949		dr1-associated corepressor
								GRMZM2G440968		Cysteine proteinase inhibitor 2
								GRMZM2G140817		Cytochrome P450 CYP98A29
11	6	155668107	Axis	CG	chr6.S_155668107	6.77e-07	0.10344	GRMZM2G006428		NA
								GRMZM2G140805		homoiothermy
								GRMZM2G440949		dr1-associated corepressor
								GRMZM2G440968		Cysteine proteinase inhibitor 2
								GRMZM2G140817		Cytochrome P450 CYP98A29
23	6	155668107	Axis	XX	chr6.S_155668107	1.46e-08	0.131892	GRMZM2G566873		NA
								GRMZM2G140805		homoiothermy
								GRMZM2G440949		dr1-associated corepressor
								GRMZM2G440968		Cysteine proteinase inhibitor 2
								GRMZM2G140817		Cytochrome P450 CYP98A29
45	7	125102102	Kernel	BLUP	chr7.S_125102102	6e-07	0.137543	GRMZM2G009045		binding||membrane
								GRMZM2G009166		protein amino acid phosphorylation
68	7	133160187	Kernel	CG	chr7.S_133160187	9.11e-07	0.101384	GRMZM2G006578		DNA binding protein
68	7	133160187	Kernel	CG	chr7.S_133160187	9.11e-07	0.101384	GRMZM2G487036		NA
								GRMZM2G006752		hypothetical protein LOC100216639
								GRMZM2G307588		Squamosa promoter-binding-like protein 9
69	7	161812736	Kernel	CG	chr7.S_161812736	2.37e-08	0.140565	GRMZM2G179779		NA
								GRMZM2G179777		triacylglycerol lipase
								GRMZM5G888034		NA
								GRMZM2G411916		ATP biosynthetic process
								GRMZM2G479163		ATP biosynthetic process
70	7	161812841	Kernel	CG	chr7.S_161812841	1.11e-06	0.109863	GRMZM2G179779		NA
								GRMZM2G179777		triacylglycerol lipase
								GRMZM5G888034		NA
								GRMZM2G411916		ATP biosynthetic process
								GRMZM2G479163		ATP biosynthetic process
12	8	11664089	Axis	CG	chr8.S_11664089	1.27e-06	0.157435	GRMZM2G440855		NA
								GRMZM2G175398		Hypothetical protein LOC100384598
								GRMZM2G440820		cellular process
25	8	16346476	Bract	BLUP	chr8.S_16346476	8.74e-07	0.140372	GRMZM2G341010		catalytic activity
								GRMZM2G033017		hypothetical protein LOC100274624
33	8	16346476	Bract	XX	chr8.S_16346476	1.59e-06	0.138207	GRMZM2G341010		catalytic activity
								GRMZM2G033017		hypothetical protein LOC100274624
72	8	75961855	Kernel	CG	chr8.S_75961855	4.22e-07	0.117075	GRMZM2G162413		hypothetical protein LOC100280367
								GRMZM2G162450		cell adhesion
28	8	126576411	Bract	CG	chr8.S_126576411	1.46e-06	0.121409	AC208327.4_FG006		acetylglucosaminyltransferase activity
								GRMZM2G389015		nucleic acid binding
								GRMZM2G389118		GTP binding
71	8	151498260	Kernel	CG	chr8.S_151498260	1.12e-06	0.103261	GRMZM2G149175		hypothetical protein LOC100279742
								GRMZM2G166192		zinc ion binding
47	9	2474377	Kernel	BLUP	chr9.S_2474377	8.87e-07	0.101622	GRMZM5G833563		catalytic activity
								GRMZM2G016275		hypothetical protein LOC100280134
								GRMZM5G845080		apoplast
								GRMZM5G812326		Transcribed locus, moderately similar to XP_002438130.1 hypothetical protein SORBIDRAFT_10g008530 [Sorghum bicolor]
48	9	2476534	Kernel	BLUP	chr9.S_2476534	1.27e-06	0.098819	GRMZM5G833563		catalytic activity
								GRMZM2G016275		hypothetical protein LOC100280134
								GRMZM5G845080		apoplast||carbohydrate metabolic process
								GRMZM5G812326		Transcribed locus, moderately similar to XP_002438130.1 hypothetical protein SORBIDRAFT_10g008530 [Sorghum bicolor]
73	9	10317385	Kernel	CG	chr9.S_10317385	8.62e-09	0.150188	GRMZM2G443256		DNA binding
73	9	10317385	Kernel	CG	chr9.S_10317385	8.62e-09	0.150188	GRMZM2G086906		40S ribosomal protein S17-4
								GRMZM2G087196		nucleolar protein 10
34	9	14548658	Bract	XX	chr9.S_14548658	1.68e-06	0.0855535	GRMZM2G300408		transposon protein
								GRMZM2G000393		galactosyltransferase activity
								GRMZM2G000423		Full-length cDNA clone ZM_BFc0173N24
								GRMZM2G000371		helicase activity
								GRMZM2G023636		ATP-dependent helicase activity
35	9	14548680	Bract	XX	chr9.S_14548680	1.68e-06	0.0855535	GRMZM2G300408		transposon protein
								GRMZM2G000393		galactosyltransferase activity
								GRMZM2G000423		Leucoanthocyanidin dioxygenase
								GRMZM2G000371		helicase activity
								GRMZM2G023636		ATP-dependent helicase activity
36	9	14548854	Bract	XX	chr9.S_14548854	1.87e-06	0.0846686	GRMZM2G300408		transposon protein
								GRMZM2G000393		galactosyltransferase activity
								GRMZM2G000423		iron ion binding
								GRMZM2G000371		helicase activity
								GRMZM2G023636		ATP-dependent helicase activity
37	9	14548892	Bract	XX	chr9.S_14548892	1.87e-06	0.0846686	GRMZM2G300408		transposon protein
								GRMZM2G000393		galactosyltransferase activity
								GRMZM2G000423		iron ion binding
								GRMZM2G000371		helicase activity
								GRMZM2G023636		ATP-dependent helicase activity
38	9	14548893	Bract	XX	chr9.S_14548893	1.87e-06	0.0846686	GRMZM2G300408		transposon protein
								GRMZM2G000393		galactosyltransferase activity
								GRMZM2G000423		Leucoanthocyanidin dioxygenase
								GRMZM2G000371		helicase activity
								GRMZM2G023636		ATP-dependent helicase activity
39	9	14549008	Bract	XX	chr9.S_14549008	1.87e-06	0.0846686	GRMZM2G300408		transposon protein
								GRMZM2G000393		galactosyltransferase activity
								GRMZM2G000423		iron ion binding
								GRMZM2G000371		helicase activity
								GRMZM2G023636		ATP-dependent helicase activity
98	9	105690237	Leaf	CG	chr9.S_105690237	1.41e-06	0.104628	GRMZM2G153924		hypothetical protein LOC100194137
95	9	126676985	Kernel	XX	chr9.S_126676985	1.17e-06	0.117482	GRMZM2G011520	ZAT6	Dual specificity phosphatase Cdc25
								GRMZM2G310321		cytochrome complex assembly
96	9	126677367	Kernel	XX	chr9.S_126677367	6.7e-07	0.117747	GRMZM2G011520	ZAT6	Dual specificity phosphatase Cdc25
								GRMZM2G310321		cytochrome complex assembly
99	9	134293640	Leaf	XX	chr9.S_134293640	1.91e-06	0.0964173	GRMZM2G068479		helicase activity
								GRMZM2G020721		hypothetical protein LOC100384114
								GRMZM2G020468		Putative uncharacterized protein
								GRMZM2G020676		hypothetical protein LOC100382149
103	9	146150604	Stem	BLUP	chr9.S_146150604	4.35e-07	0.125298	AC233893.1_FG006		ATP binding
111	9	146150604	Stem	XX	chr9.S_146150604	1.18e-07	0.13665	AC233893.1_FG006		ATP binding
46	9	151482354	Kernel	BLUP	chr9.S_151482354	2.1e-07	0.13875	GRMZM2G120987		catalytic activity
								GRMZM2G120975		calcium ion binding
								GRMZM2G420926		hydrolase activity
97	9	151482354	Kernel	XX	chr9.S_151482354	9.42e-07	0.123082	GRMZM2G120987		catalytic activity
								GRMZM2G120975		calcium ion binding
								GRMZM2G420926		hydrolase activity
10	9	153671059	Axis	BLUP	chr9.S_153671059	1.33e-06	0.0970102	GRMZM2G382537		activation of protein kinase C activity by G-protein coupled receptor protein signaling pathway
								GRMZM2G317919		NA
								GRMZM2G382534		beta-carotene hydroxylase
								GRMZM2G317931		hypothetical protein LOC100276556
								GRMZM2G317938		protein amino acid phosphorylation
24	9	153671059	Axis	XX	chr9.S_153671059	1.6e-06	0.0955572	GRMZM2G382537		activation of protein kinase C activity by G-protein coupled receptor protein signaling pathway
								GRMZM2G317919		NA
								GRMZM2G382534		beta-carotene hydroxylase
								GRMZM2G317931		hypothetical protein LOC100276556
								GRMZM2G317938		protein amino acid phosphorylation
13	9	155343624	Axis	CG	chr9.S_155343624	5.06e-07	0.242894	GRMZM5G827026		NA
106	10	6677597	Stem	CG	chr10.S_6677597	1.34e-06	0.101106	GRMZM2G052515		hypothetical protein LOC100192057
								GRMZM2G052499		DNA binding
107	10	6677974	Stem	CG	chr10.S_6677974	4.22e-07	0.108572	GRMZM2G052515		hypothetical protein LOC100192057
								GRMZM2G052499		DNA binding
40	10	52742759	Kernel	BLUP	chr10.S_52742759	1.98e-06	0.127304	AC200225.5_FG001		NA
26	10	71281889	Bract	CG	chr10.S_71281889	1.82e-06	0.0837747	GRMZM2G023422		3'-5' exonuclease activity
								GRMZM2G023275		Transcribed locus, strongly similar to XP_002443942.1 hypothetical protein SORBIDRAFT_07g004780 [Sorghum bicolor]
88	10	72646909	Kernel	XX	chr10.S_72646909	2.46e-07	0.153572	GRMZM2G141071		Clone 378599 mRNA sequence
100	10	127359876	Stem	BLUP	chr10.S_127359876	8.01e-09	0.232693	GRMZM2G005633		Endochitinase B Precursor; Fragment (EC 3.2.1.14)(Seed chitinase B)
								GRMZM2G006428		zinc ion binding
								GRMZM2G006216		hypothetical protein LOC100304233
								GRMZM2G005939		ER33 protein
105	10	127359876	Stem	CG	chr10.S_127359876	1.11e-06	0.171468	GRMZM2G005633		Endochitinase B Precursor; Fragment (EC 3.2.1.14)(Seed chitinase B)
								GRMZM2G006428		zinc ion binding
								GRMZM2G006216		hypothetical protein LOC100304233
								GRMZM2G005939		ER33 protein
108	10	127359876	Stem	XX	chr10.S_127359876	5.81e-09	0.237085	GRMZM2G005633		Endochitinase B Precursor; Fragment (EC 3.2.1.14)(Seed chitinase B)
								GRMZM2G006428		zinc ion binding
								GRMZM2G006216		hypothetical protein LOC100304233
								GRMZM2G005939		ER33 protein
